# Supplementary material
Source: PubMed Central journal article supplement (PMC4027512)
Supplement: ml400142s_si_001.pdf [file ml400142s_si_001.pdf]

## **Supporting Information**

### **Non-cross-bridged tetraazamacrocyclic chelator for stable $^{64}\text{Cu}$ -based radiopharmaceuticals**

Ajit V. Dale,<sup>†, ‡</sup> Darpan N. Pandya,<sup>†, ‡</sup> Jung Young Kim,<sup>±</sup> Hochun Lee,<sup>||</sup> Yeong Su Ha,<sup>†</sup> Nikunj Bhatt,<sup>†</sup> Jonghee Kim,<sup>†</sup> Jeong Ju Seo,<sup>#</sup> Woonghee Lee,<sup>†</sup> Sung Hong Kim,<sup>§</sup> Young-Ran Yoon,<sup>#</sup> Gwang Il An,<sup>\*, ±</sup> and Jeongsoo Yoo<sup>\*, †</sup>

<sup>†</sup>Department of Molecular Medicine, Kyungpook National University School of Medicine, Daegu, 700-422, South Korea.

<sup>±</sup>Molecular Imaging Research Centre, Korea Institute of Radiological and Medical Sciences, Seoul, 139-706, South Korea.

<sup>||</sup>Department of Energy Systems Engineering, Daegu Gyeongbuk Institute of Science & Technology, Daegu, 711-873, South Korea.

<sup>#</sup>Department of Biomedical Science and Clinical Trial Center, Kyungpook National University Graduates School and Hospital, Daegu, South Korea.

<sup>§</sup>Analysis Research Division, Daegu Center, Korea Basic Science Institute, Daegu 702-701, South Korea.

#### **Table of Contents**

|                                                                                                                                     |    |
|-------------------------------------------------------------------------------------------------------------------------------------|----|
| Synthesis and characterization of <b>4</b> .....                                                                                    | 3  |
| Synthesis and characterization of <b>5</b> .....                                                                                    | 5  |
| Synthesis and characterization of <b>7</b> .....                                                                                    | 7  |
| Synthesis and characterization of <b>8</b> .....                                                                                    | 9  |
| Synthesis of copper complex of MM-TE2A (Cu-MM-TE2A).....                                                                            | 11 |
| Synthesis of copper complex of DM-TE2A (Cu-DM-TE2A).....                                                                            | 12 |
| Acid decomplexation studies of Cu-MM/DM-TE2A by HPLC.....                                                                           | 13 |
| Electrochemical studies of Cu-MM/DM-TE2A by HPLC.....                                                                               | 13 |
| Radio labeling of MM-TE2A and DM-TE2A with $^{64}\text{Cu}$ using $\text{Cs}_2\text{CO}_3$ .....                                    | 13 |
| In Vitro Serum Stability of $^{64}\text{Cu}$ -MM-TE2A and $^{64}\text{Cu}$ -DM-TE2A.....                                            | 15 |
| Determination of Partition Coefficients of $^{64}\text{Cu}$ -TE2A, $^{64}\text{Cu}$ -MM/DM-TE2A and $^{64}\text{Cu}$ -ECB-TE2A..... | 16 |
| Comparative biodistribution of $^{64}\text{Cu}$ -MM-TE2A, $^{64}\text{Cu}$ -DM-TE2A and $^{64}\text{Cu}$ -ECB-TE2A .....            | 16 |
| References.....                                                                                                                     | 18 |

**Materials and methods:** Cyclam and ECB-TE2A were purchased from CheMatech (Dijon, France). All other reagents and solvents were purchased from Sigma-Aldrich (St. Louis, MO) and were used as received. Copper-64 was produced at KIRAMS (Seoul, Korea) by the  $^{64}\text{Ni}(\text{p},\text{n})^{64}\text{Cu}$  nuclear reaction using an MC50 Cyclotron (Scanditronix, Sweden). TE2A and Cu-TE2A was prepared according to published literature procedure.<sup>1</sup> Cu-ECB-TE2A<sup>2</sup> and  $^{64}\text{Cu}$ -ECB-TE2A<sup>3</sup> was prepared according to published literature procedure.

**Instrumentation:** All  $^1\text{H}$  NMR and  $^{13}\text{C}$  NMR spectra were measured on Varian Unity Inova 500 MHz instrument. High-resolution mass spectra (HRMS) were recorded on JEOL JMS700 or Quattro Premier XE mass spectrometer. UV-Vis spectra were acquired on a Shimadzu UV-Vis spectrophotometer (UV-1650PC). Analytical HPLC traces were acquired using Waters 600 series HPLC system and Waters Xbridge C18 column (4.6 X 150 mm, 5  $\mu\text{m}$ ) with an isocratic method (water, 1 mL/min flow rate). The radio-TLC measurements were performed using a Bioscan 2000 imaging scanner (Bioscan, Washington, D.C., USA).

**Synthesis of 1,8-N,N'-bis-(carbo-*tert*-butoxymethyl)-4,11-N'',N'''-bis-(methyl)-1,4,8,11-tetraaza cyclotetradecane (4).** To a solution of **3** (3.06 g, 7.14 mmol) in anhydrous ethanol (80 mL) were added NaBH<sub>4</sub> (8.10 g, 214.2 mmol). After stirring for 24 h at room temperature, the solvent was removed under reduced pressure, residue was dissolved in CH<sub>2</sub>Cl<sub>2</sub> (150 mL) and filtered. The filtrate was evaporated and residue was purified via column chromatography on silica, eluting with Chlorofom/isopropyl amine (20:2) to afford clear oil **4**, (3.05 g, 94% yield). <sup>1</sup>H NMR (500 MHz, CDCl<sub>3</sub>): δ 3.23 (s, 4H), 2.80-2.62 (m, 8H) 2.43 (br s, 8H), 2.19 (s, 6H), 1.68-1.58 (m, 4H), 1.42 (s, 18H); <sup>13</sup>C NMR (125 MHz, CDCl<sub>3</sub>): δ 170.89, 80.61, 56.50, 54.51, 53.91, 51.00, 50.55, 43.29, 28.15, 24.66; HRMS (FAB) calculated for C<sub>24</sub>H<sub>49</sub>N<sub>4</sub>O<sub>4</sub>, 457.3754 [(M+H)<sup>+</sup>], found: 457.3756 [(M+H)<sup>+</sup>].

**<sup>1</sup>H-N.M.R. (CDCl<sub>3</sub>-500 MHz)**

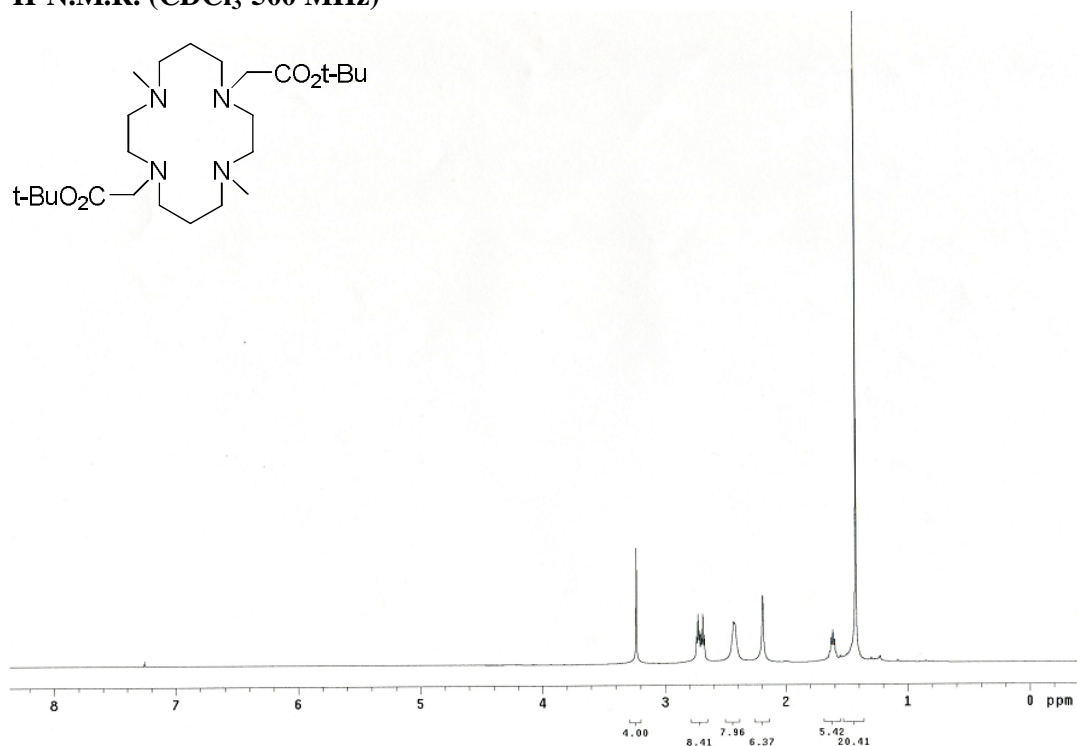

**$^{13}\text{C}$ -N.M.R. ( $\text{CDCl}_3$ -500 MHz)**

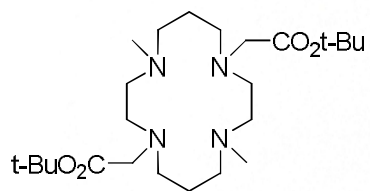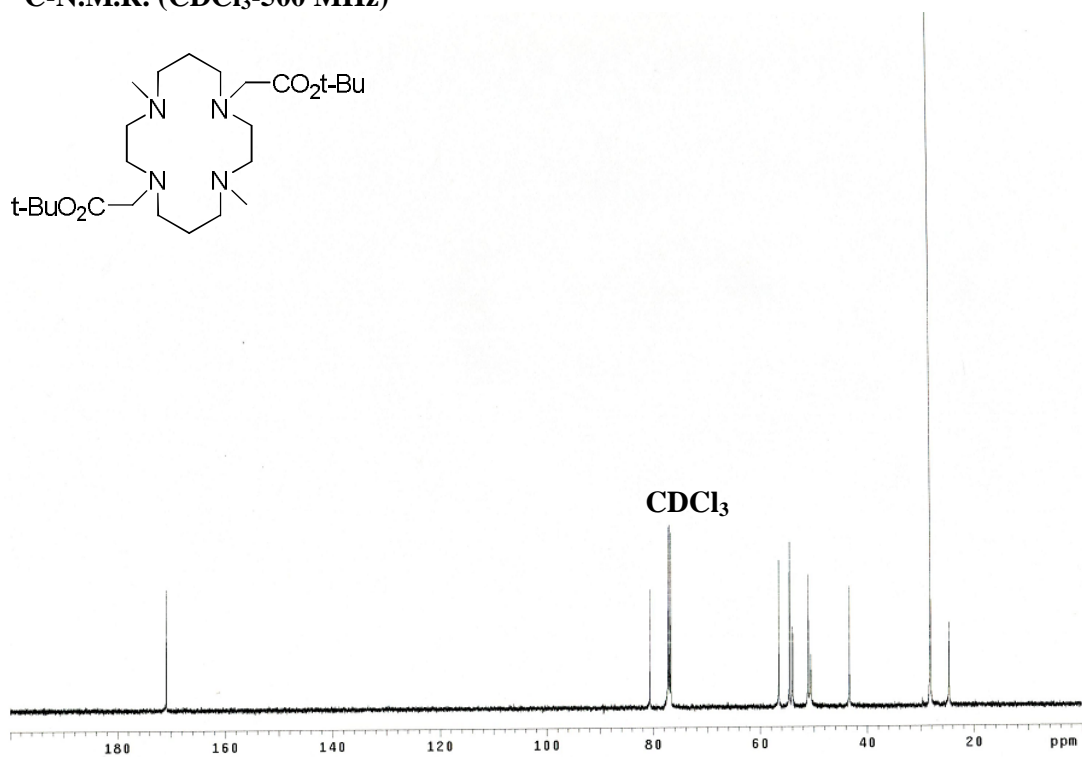

**HRMS**

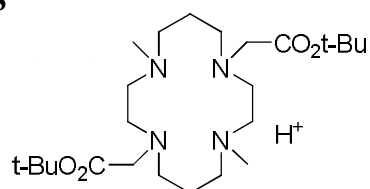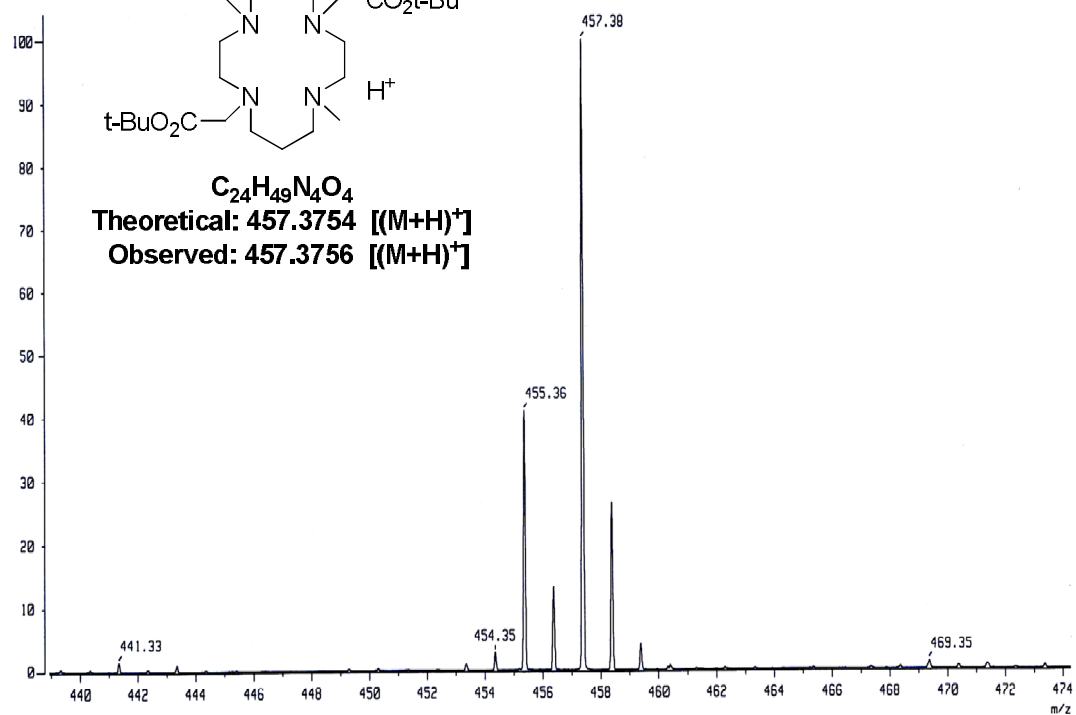

**Synthesis of 1,8-N,N'-bis-(carboxymethyl)-4,11-N'',N'''-bis-(methyl)-1,4,8,11-tetraazacyclotetra decane (5).** Compound **4** (1.46 g, 3.19 mmol) was dissolved in a 1:1 (vol:vol) mixture of CF<sub>3</sub>CO<sub>2</sub>H (TFA) and CH<sub>2</sub>Cl<sub>2</sub> (50 mL). The mixture was stirred at room temperature for 24 h. The solvent was removed under reduced pressure to give an oily residue which was triturated with Et<sub>2</sub>O to provide white solid **5** (1.81 g, 99% yield). <sup>1</sup>H NMR (500 MHz, D<sub>2</sub>O): δ 3.60 (s, 4H), 3.40-3.10 (m, 12H), 2.94 (br s, 4H), 2.79 (s, 6H), 1.94 (br s, 4H); <sup>13</sup>C NMR (125 MHz, D<sub>2</sub>O): δ 181.49, 179.53, 59.02, 52.49, 51.42, 51.20, 48.80, 42.93, 42.39, 23.34, 21.72; HRMS (FAB) calculated for C<sub>16</sub>H<sub>33</sub>N<sub>4</sub>O<sub>4</sub>, 345.2502 [(M+H)<sup>+</sup>], found: 345.2502 [(M+H)<sup>+</sup>].

**<sup>1</sup>H-N.M.R. (D<sub>2</sub>O-400 MHz)**

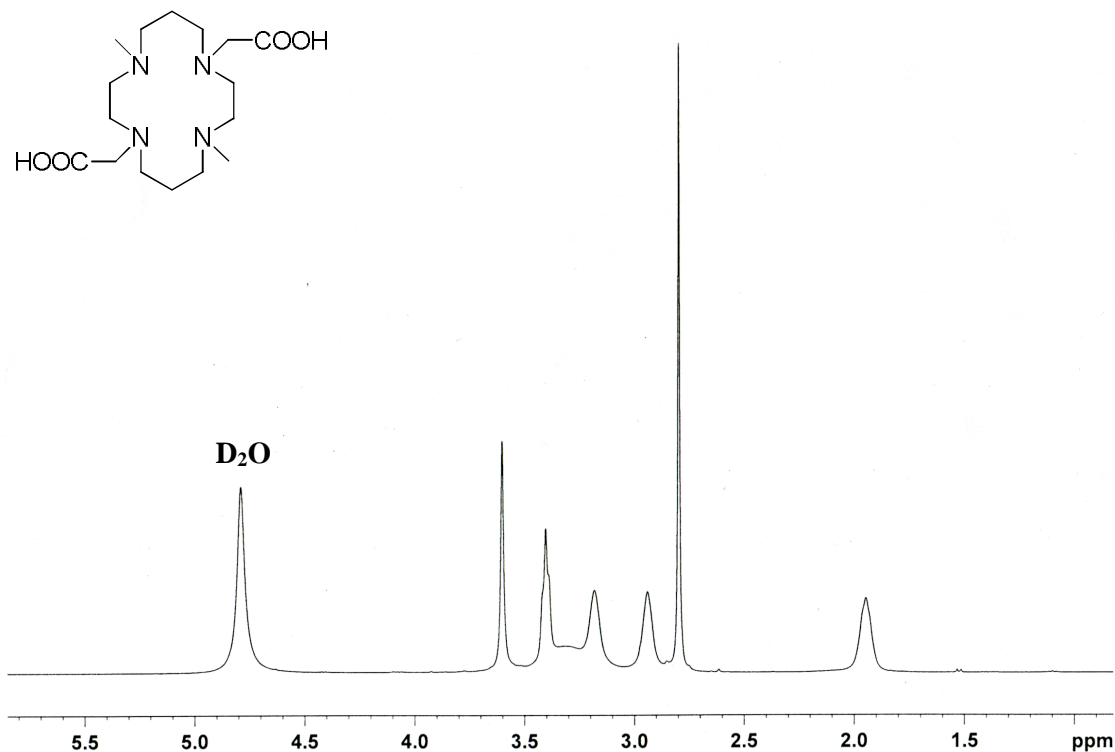

**$^{13}\text{C}$ -N.M.R. ( $\text{D}_2\text{O}$ -500 MHz)**

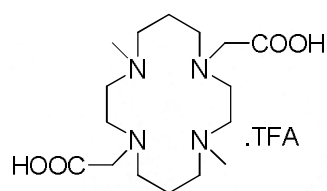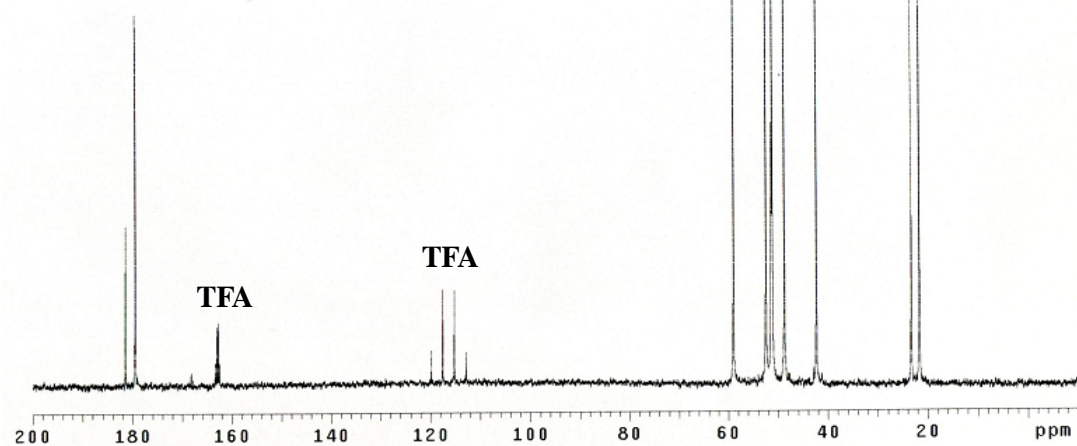

**HRMS**

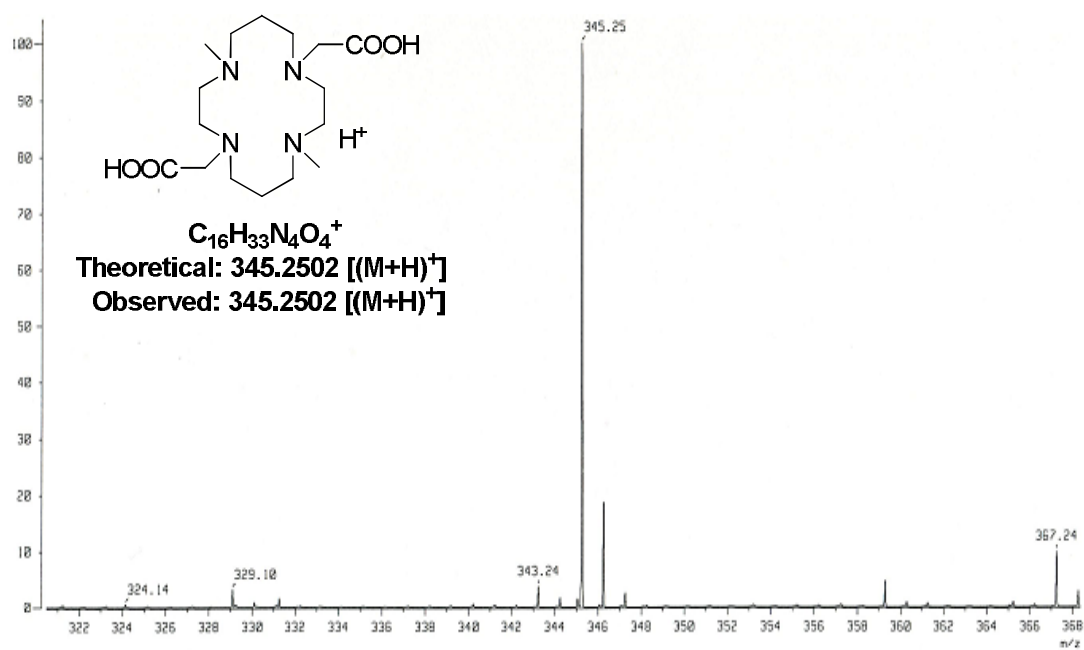

**Synthesis of 1,8-N,N'-bis-(carbo-*tert*-butoxymethyl)-4-*N'*-(methyl)-1,4,8,11-tetraazacyclotetradecane (7).** To a solution of **6** (2.33 g, 5.43 mmol) in anhydrous chloroform (50 mL) was added methyl iodide (6.78 ml, 15.43 g, 108.72 mmol). After stirring for 24 h at room temperature, the solvent was removed under reduced pressure and residue was purified via column chromatography on silica, eluting with Chloroform/isopropyl amine (20:2) to afford a clear oil **7**, (2.41 g, 84% yield).  $^1\text{H}$  NMR (500 MHz,  $\text{CDCl}_3$ ):  $\delta$  3.27-3.25 (dd, 4H), 2.84-2.43 (m, 16H), 2.16 (s, 3H), 1.73-1.59 (m, 4H), 1.45 (s, 18H);  $^{13}\text{C}$  NMR (125 MHz,  $\text{CDCl}_3$ ):  $\delta$  170.94, 170.68, 80.57, 55.99, 55.93, 54.80, 53.77, 53.40, 52.26, 50.11, 48.34, 47.41, 47.17, 41.88, 28.18, 25.59, 25.00; HRMS (FAB) calculated for  $\text{C}_{23}\text{H}_{47}\text{N}_4\text{O}_4$ , 443.3597  $[(\text{M}+\text{H})^+]$ , found: 443.3600  $[(\text{M}+\text{H})^+]$ .

**$^1\text{H}$ -N.M.R. ( $\text{CDCl}_3$ -500 MHz)**

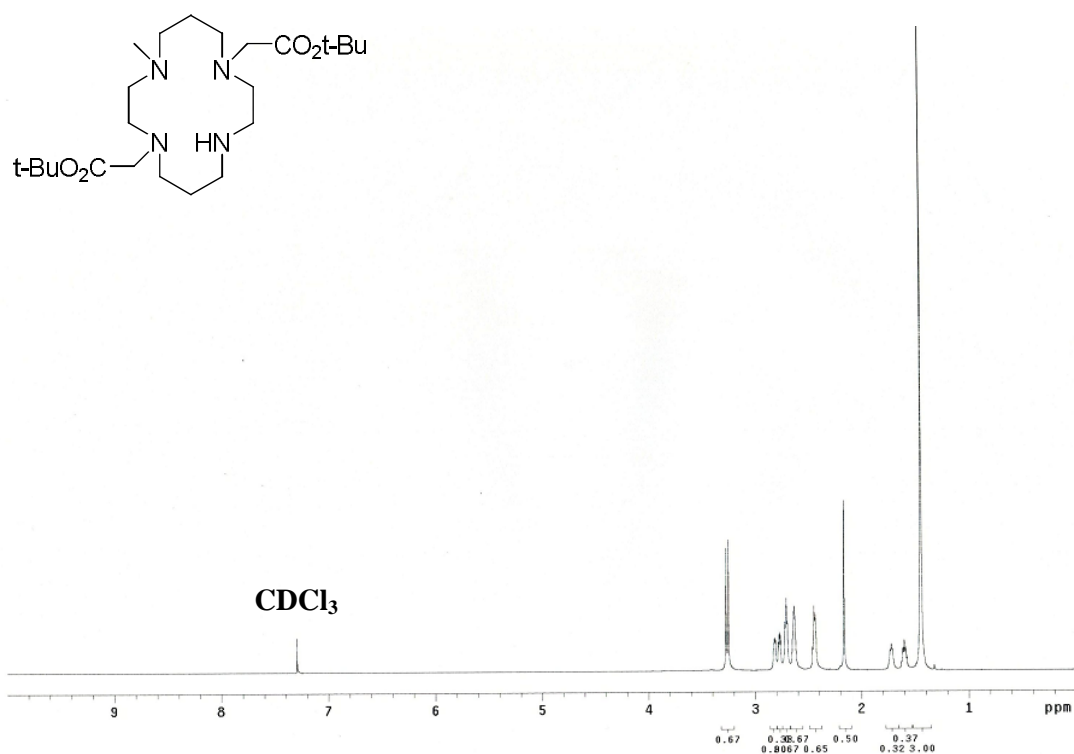

**$^{13}\text{C}$ -N.M.R. ( $\text{CDCl}_3$ -125 MHz)**

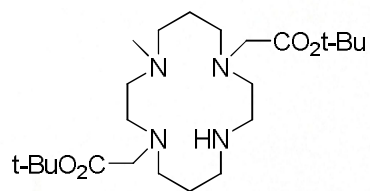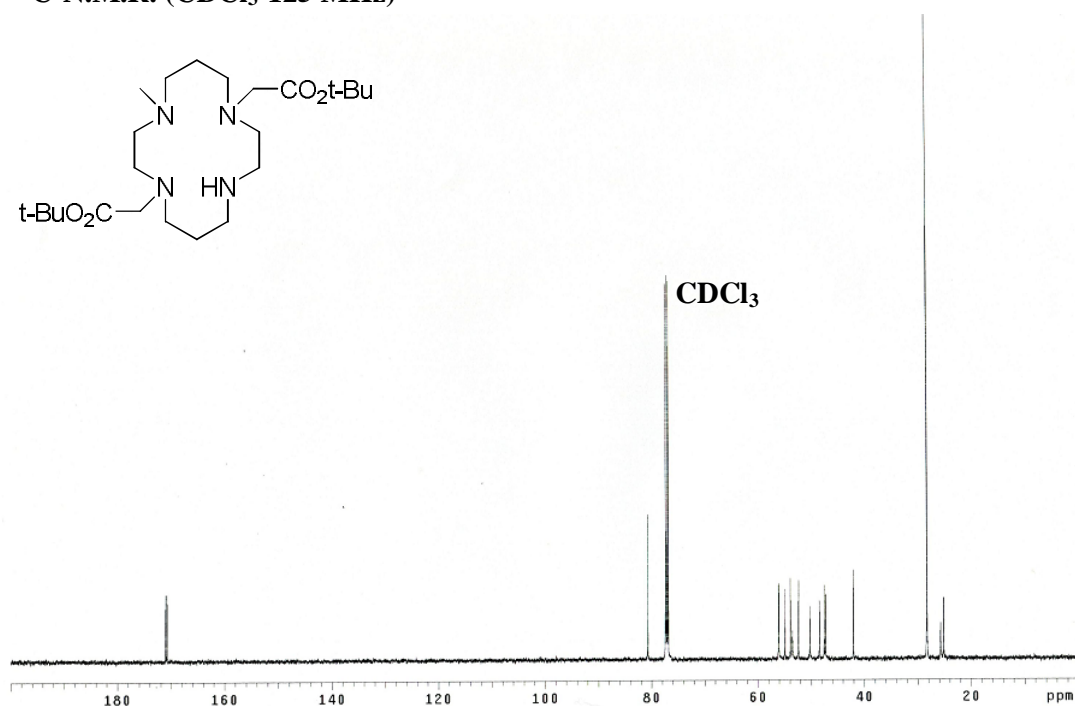

**HRMS**

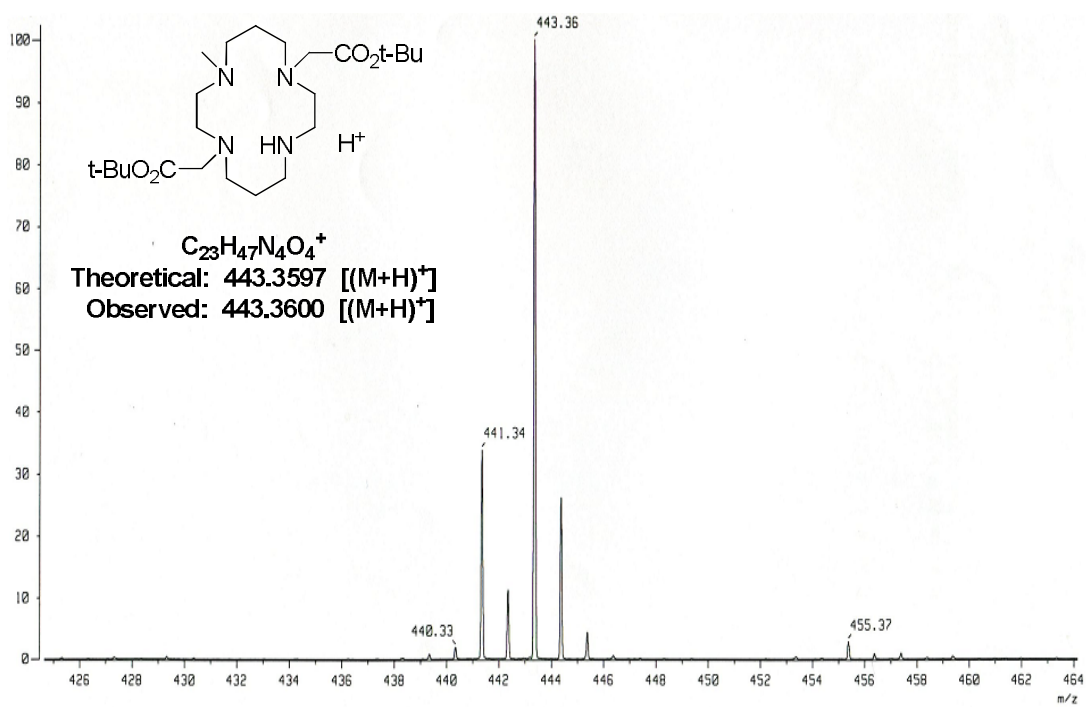

**Synthesis of 1,8-N,N'-bis-(carboxymethyl)-4-N''-(methyl)-1,4,8,11-tetraazacyclotetradecane (8).** Compound **7** (1.56 g, 3.52 mmol) was dissolved in a 1:1 (vol:vol) mixture of CF<sub>3</sub>CO<sub>2</sub>H (TFA) and CH<sub>2</sub>Cl<sub>2</sub> (60 mL). The mixture was stirred at room temperature for 24 h. The solvent was removed under reduced pressure to give an oily residue which was triturated with Et<sub>2</sub>O to provide white solid **8** (1.95 g, 99% yield). <sup>1</sup>H NMR (500 MHz, D<sub>2</sub>O): δ 3.60-3.05 (m, 13H), 2.98-2.641 (m, 10H), 2.12-1.82 (m, 4H); <sup>13</sup>C NMR (125 MHz, D<sub>2</sub>O): δ 177.20, 175.83, 56.71, 55.87, 54.50, 54.22, 52.92, 48.268, 44.94, 41.15, 22.61, 20.64; HRMS (FAB) calculated for C<sub>15</sub>H<sub>31</sub>N<sub>4</sub>O<sub>4</sub>, 331.2345 [(M+H)<sup>+</sup>], found: 331.2347 [(M+H)<sup>+</sup>].

**<sup>1</sup>H-N.M.R. (D<sub>2</sub>O-500 MHz)**

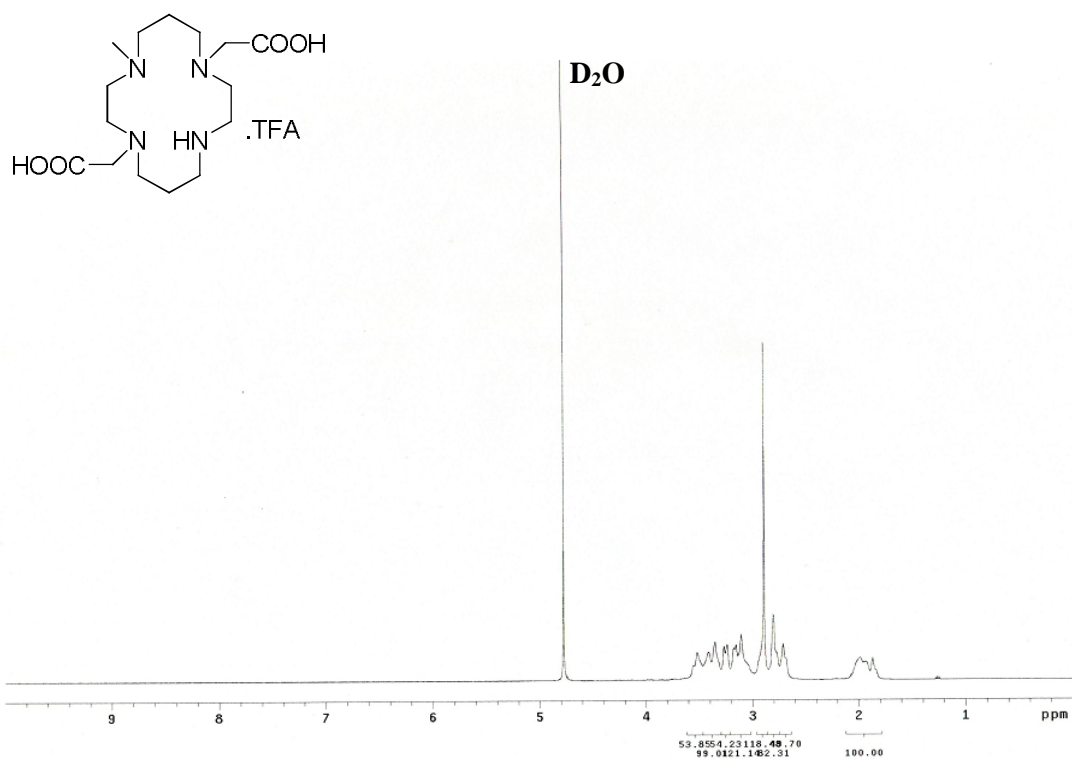

**$^{13}\text{C}$ -N.M.R. ( $\text{D}_2\text{O}$ -125 MHz)**

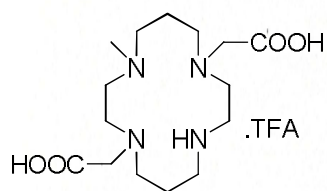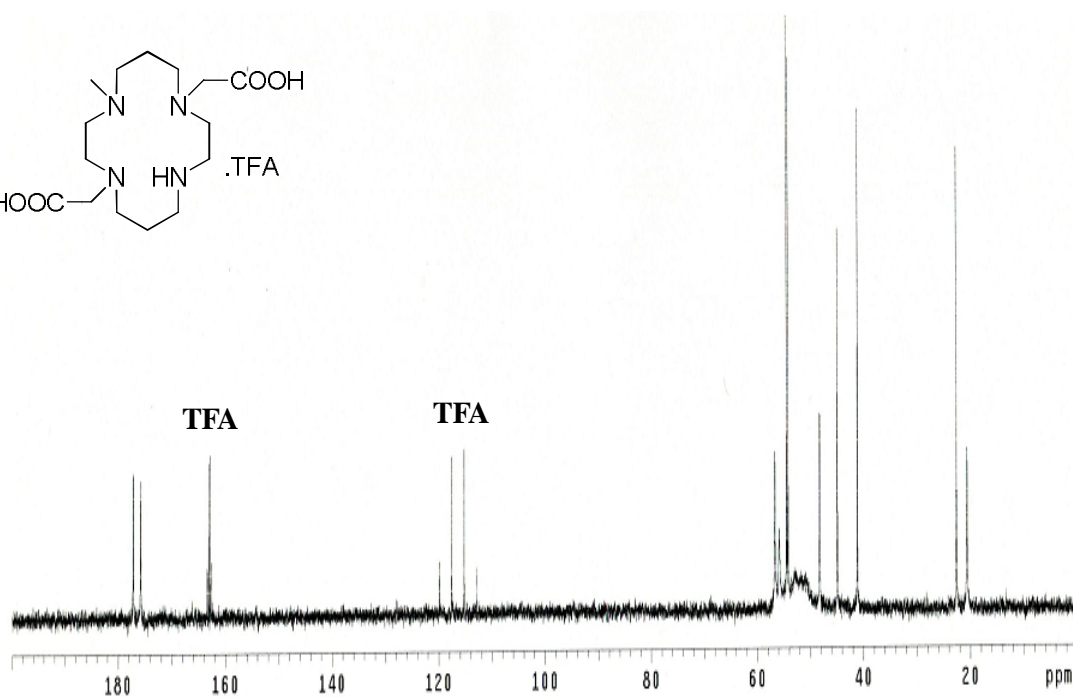

**HRMS**

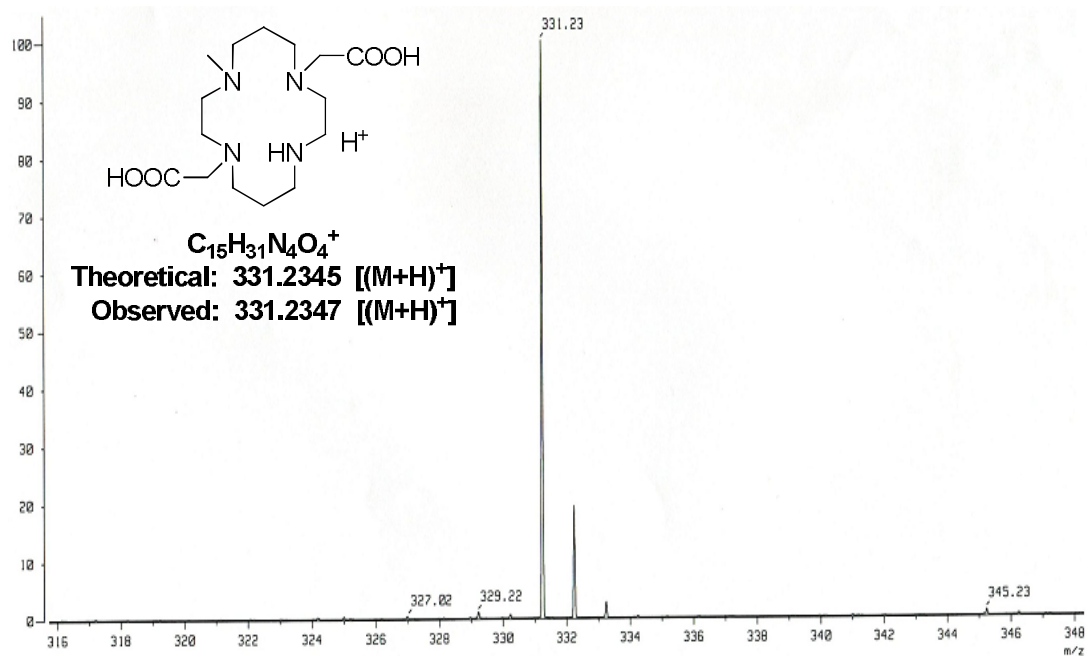

**Scheme S1.** Synthesis of copper complex of MM-TE2A (Cu-MM-TE2A)

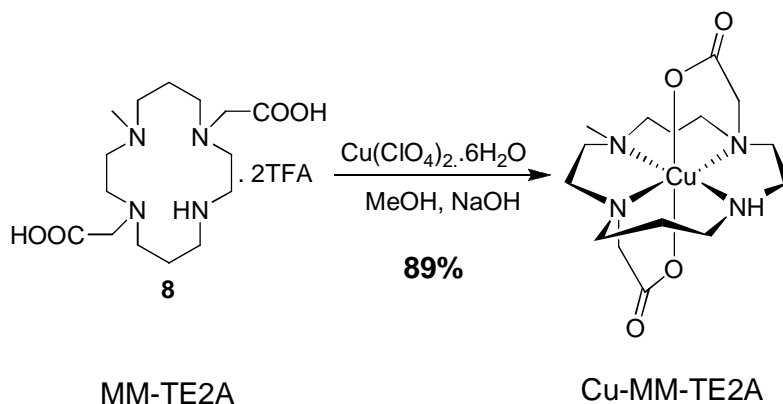

**Synthesis of Cu-MM-TE2A.** To a solution of MM-TE2A **8** (265 mg, 0.47 mmol) and  $\text{Cu}(\text{ClO}_4)_2 \cdot 6\text{H}_2\text{O}$  (176 mg, 0.47 mmol) in 22 mL of methanol was added 1M aqueous solution of NaOH (2.82 mL). The resulting clear blue solution was refluxed for 2 h, cooled, and filtered through celite bed. The filtrate was subjected to diethyl ether diffusion. The deposited blue crystals were collected and dried. (166 mg, 89% yield). HRMS (FAB): Calculated for  $\text{C}_{15}\text{H}_{28}\text{CuNaN}_4\text{O}_4$ , 414.1304  $[(\text{M}+\text{Na})^+]$  Found: 414.1302  $[(\text{M}+\text{Na})^+]$ , Visible electronic spectrum:  $\lambda_{\text{max}}$  (5 M HCl)/561 nm ( $\epsilon = 33 \text{ M}^{-1} \text{ cm}^{-1}$ ).

**HRMS**

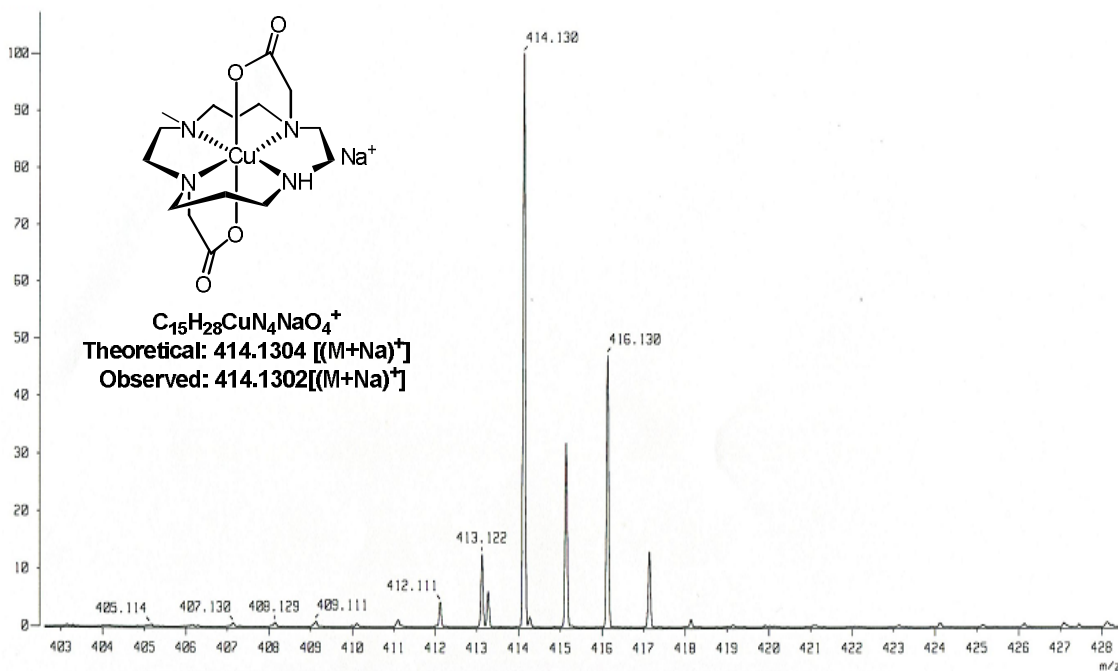

**Scheme S2.** Synthesis of copper complex of DM-TE2A (Cu-DM-TE2A)

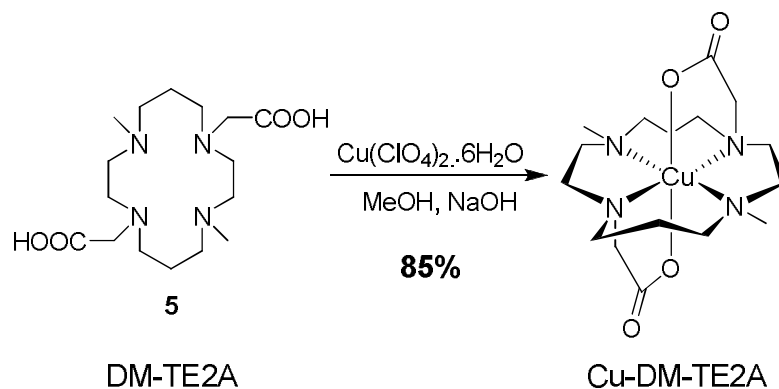

**Synthesis of Cu-DM-TE2A.** To a solution of DM-TE2A **5** (253 mg, 0.73 mmol) and  $\text{Cu}(\text{ClO}_4)_2 \cdot 6\text{H}_2\text{O}$  (272 mg, 0.73 mmol) in 25 mL of methanol was added 1M aqueous solution of NaOH (4.38 ml). The resulting clear blue solution was refluxed for 2 h, cooled, and filtered through celite bed. The filtrate was subjected to diethyl ether diffusion. The deposited blue crystals were collected and dried. (253 mg, 85% yield). HRMS (FAB): Calculated for  $\text{C}_{16}\text{H}_{30}\text{CuNaN}_4\text{O}_4$ , 428.1461  $[(\text{M}+\text{Na})^+]$  Found: 428.1462  $[(\text{M}+\text{Na})^+]$ , Visible electronic spectrum:  $\lambda_{\text{max}}$  (5 M HCl)/585 nm ( $\epsilon = 36 \text{ M}^{-1} \text{ cm}^{-1}$ ).

**HRMS**

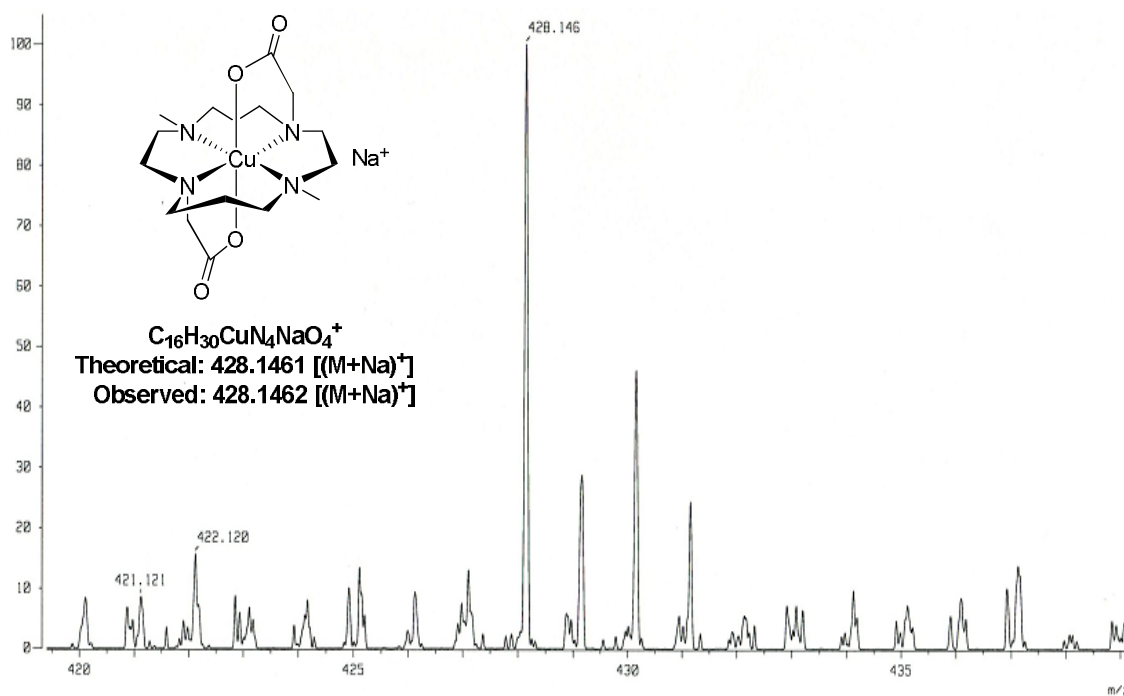

**Acid decomplexation studies by HPLC:** Sample concentration of copper complexes (Cu-MM-/DM-TE2A, Cu-TE2A and Cu-ECB-TE2A) studied were 3 mM concentration in 2mL 12 M HCl. UV HPLC spectrum in 12 M HCl at 90°C was recorded at specific time points by injecting an aliquot (20  $\mu$ L) onto a reverse phase Xbridge C18 column (4.6 x 150 mm, 5  $\mu$ m) with an isocratic method [Cu-MM-/DM-TE2A (water), Cu-TE2A(30 mM citric acid) and Cu-ECB-TE2A (water:MeOH 95:5), 1mL/min flow rate). The decreasing absorbance at UV region (280 nm) was used to monitor the progress of the decomplexation reaction.

**Electrochemical studies:** Cyclic voltammetry was conducted with a Biologic model SP-150 with three-electrode configuration. The working electrode was a glassy carbon (diameter = 3 mm), Ag/AgCl (sat. KCl) reference electrode and Pt wire counter electrode. Samples (1 mM) were run in 0.2 M phosphate buffer adjusted to pH 7.0 with glacial acetic acid at a scan rate 100 mV/s. The solutions were deoxygenated for 15 min with Ar prior to use and kept under Ar atmosphere during measurement.

**Radio labeling of MM-TE2A and DM-TE2A with  $^{64}\text{Cu}$  using  $\text{Cs}_2\text{CO}_3$ :** Complexation of  $^{64}\text{Cu}$  with MM-TE2A and DM-TE2A was achieved by a 60-min pre-incubation of MM-TE2A and DM-TE2A (100–500  $\mu\text{g}$ ) in EtOH with an excess of  $\text{Cs}_2\text{CO}_3$  at  $50^\circ\text{C}$  respectively, with constant stirring. Following centrifugation, addition of no-carrier-added  $^{64}\text{CuCl}_2$  to the isolated supernatant was accompanied by precipitation of  $\text{CsCl}$ . The mixture was vortexed and incubated at  $50^\circ\text{C}$  for MM-TE2A and DM-TE2A respectively for another 60 min. The mixture was centrifuged, and the supernatant was evaporated. Water was added to the dried mixture, and passed through the  $0.2\mu\text{m}$  Nylon Acrodisk 13 filter. Formation of  $^{64}\text{Cu}$ -MM-TE2A and  $^{64}\text{Cu}$ -DM-TE2A complexes was verified by radio-TLC using a mobile phase consisting of 1:1 MeOH:10% ammonium acetate on silica plates. Radio-HPLC analysis of  $^{64}\text{Cu}$ -MM-TE2A and  $^{64}\text{Cu}$ -DM-TE2A was accomplished using Xbridge C18 column ( $4.6 \times 150\text{ mm}$ ,  $5\mu\text{m}$ ) with an isocratic method (100% water, 1 mL/min flow rate)

(A)

| Reg     | (mm)<br>Start | (mm)<br>Stop | (mm)<br>Centroid | RF    | Region<br>Counts | Region<br>CPM | % of<br>Total | % of<br>ROI |
|---------|---------------|--------------|------------------|-------|------------------|---------------|---------------|-------------|
| Rgn 1   | 35.3          | 48.2         | 41.1             | 0.021 | 93841.0          | 46920.5       | 96.59         | 100.00      |
| 1 Peaks |               |              |                  |       | 93841.0          | 46920.5       | 96.59         | 100.00      |

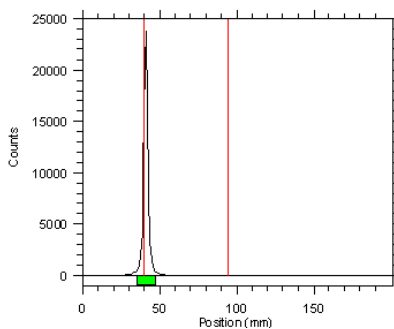

(B)

| Reg     | (mm)<br>Start | (mm)<br>Stop | (mm)<br>Centroid | RF    | Region<br>Counts | Region<br>CPM | % of<br>Total | % of<br>ROI |
|---------|---------------|--------------|------------------|-------|------------------|---------------|---------------|-------------|
| Rgn 1   | 67.1          | 84.3         | 75.3             | 0.367 | 183859.0         | 91929.5       | 97.20         | 100.00      |
| 1 Peaks |               |              |                  |       | 183859.0         | 91929.5       | 97.20         | 100.00      |

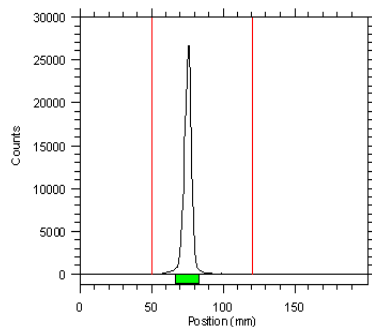

(C)

| Reg     | (mm)<br>Start | (mm)<br>Stop | (mm)<br>Centroid | RF    | Region<br>Counts | Region<br>CPM | % of<br>Total | % of<br>ROI |
|---------|---------------|--------------|------------------|-------|------------------|---------------|---------------|-------------|
| Rgn 1   | 59.3          | 74.8         | 66.2             | 0.271 | 130078.0         | 65039.0       | 92.31         | 100.00      |
| 1 Peaks |               |              |                  |       | 130078.0         | 65039.0       | 92.31         | 100.00      |

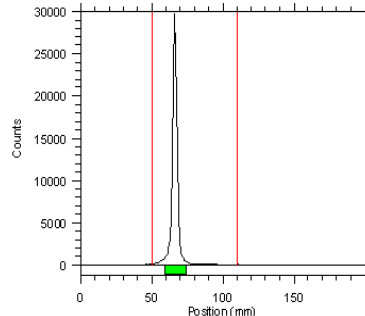

**Figure S1.** Radio-TLC of  $^{64}\text{CuCl}_2$  (A)  $^{64}\text{Cu}$ -MM-TE2A (B) and  $^{64}\text{Cu}$ -DM-TE2A (C) [ $\text{Cs}_2\text{CO}_3$  method]

**In Vitro Serum Stability:** In vitro serum stability of  $^{64}\text{Cu}$ -MM-TE2A and  $^{64}\text{Cu}$ -DM-TE2A were carried out by adding 50  $\mu\text{L}$  of  $^{64}\text{Cu}$ -MM-TE2A and  $^{64}\text{Cu}$ -DM-TE2A (5 mM,  $\sim 500\mu\text{Ci}$ ) to 500  $\mu\text{L}$  of FBS (Fetal Bovine Serum). The solution was incubated at  $37^\circ\text{C}$ , and samples were analyzed by radio-TLC at 10, 30, and 60 min and at 2, 4, 10 and 24 h post-administration to FBS.

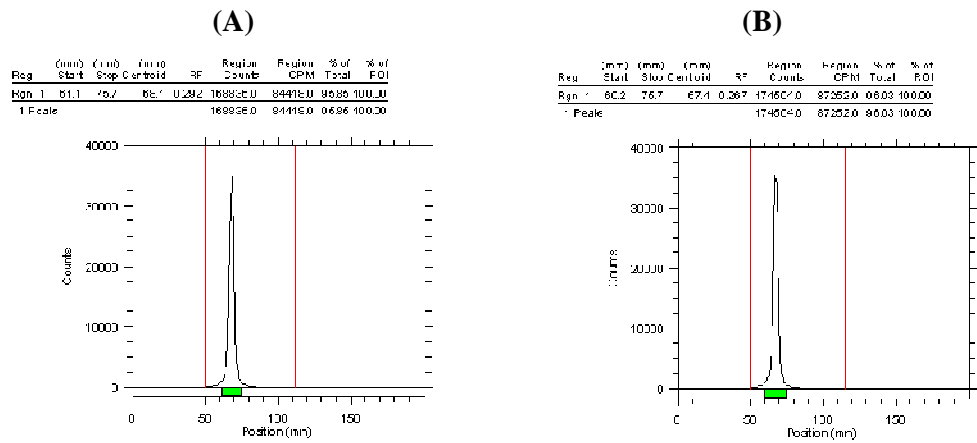

**Figure S2.** Radio-TLC of  $^{64}\text{Cu}$ -MM-TE2A (A) and  $^{64}\text{Cu}$ -DM-TE2A (B) solution in FBS at  $37^\circ\text{C}$  after 24 h.

**Determination of Partition Coefficients:**<sup>3</sup> The log*P* values of <sup>64</sup>Cu complexes of MM-TE2A, DM-TE2A, TE2A and ECB-TE2A were determined by adding 5 µL of the labeled complex (~ 40-50 µCi) to a mixture of 500 µL of 1-octanol and 500 µL of water. The resulting solutions were vigorously vortexed for 5 min at room temperature, then centrifuged for 5 min to ensure complete separation of layers. From each of the six sets, 100 µL aliquot was removed from each phase into screw tubes and counted separately in a gamma counter. The partition coefficient was calculated as a ratio of counts in the 1-octanol fraction to counts in the water fraction. The log*P* values were reported in an average of six measurements.

**Comparative biodistribution of <sup>64</sup>Cu-MM-TE2A, <sup>64</sup>Cu-DM-TE2A and <sup>64</sup>Cu-ECB-TE2A:** Six week old, mature, female, Balb-c mice (n = 5) were injected via tail-vein with <sup>64</sup>Cu-MM-TE2A, <sup>64</sup>Cu-DM-TE2A, and <sup>64</sup>Cu-ECB-TE2A (ca. 20 µCi in 200 µL per mice). Animals were sacrificed at 30min, 4h and 24h post-injection. Organs and tissues of interest (Blood, Heart, Lung, Muscle, Bone, Spleen, Kidney and Liver) were removed, weighted, and counted using gamma-counter. The %ID per gram (%ID/g) was calculated by comparison to a weighted, counted standard.

**Table S1.** Mice biodistribution (%ID/g) of <sup>64</sup>Cu-MM-TE2A in selected organs at 30 min, 4 h and 24 h post injection.

| Tissue/<br>Organ | <sup>64</sup> Cu-MM-TE2A |         |       |         |       |         |                         |
|------------------|--------------------------|---------|-------|---------|-------|---------|-------------------------|
|                  | 30min                    |         | 4 h   |         | 24h   |         |                         |
|                  |                          |         |       |         |       |         | 95% confidence interval |
|                  |                          |         |       |         |       |         | Lower Upper             |
| Blood            | 0.942                    | ± 0.047 | 0.015 | ± 0.002 | 0.019 | ± 0.003 | 0.015 0.023             |
| Heart            | 0.324                    | ± 0.051 | 0.064 | ± 0.024 | 0.072 | ± 0.023 |                         |
| Lung             | 0.824                    | ± 0.083 | 0.109 | ± 0.013 | 0.105 | ± 0.034 |                         |
| Muscle           | 0.304                    | ± 0.042 | 0.037 | ± 0.009 | 0.076 | ± 0.017 |                         |
| Bone             | 0.282                    | ± 0.022 | 0.064 | ± 0.019 | 0.081 | ± 0.013 |                         |
| Spleen           | 0.334                    | ± 0.031 | 0.064 | ± 0.009 | 0.069 | ± 0.005 |                         |
| Kidney           | 3.491                    | ± 0.402 | 0.853 | ± 0.358 | 0.162 | ± 0.021 | 0.136 0.188             |
| Liver            | 0.928                    | ± 0.236 | 0.489 | ± 0.059 | 0.168 | ± 0.035 | 0.112 0.224             |

**Table S2.** Mice biodistribution (%ID/g) of  $^{64}\text{Cu}$ -DM-TE2A in selected organs at 30 min, 4 h and 24 h post injection.

| Tissue/<br>Organ | $^{64}\text{Cu}$ -DM-TE2A |         |       |         |       |         |                         |
|------------------|---------------------------|---------|-------|---------|-------|---------|-------------------------|
|                  | 30min                     |         | 4 h   |         | 24h   |         |                         |
|                  |                           |         |       |         |       |         | 95% confidence interval |
|                  |                           |         |       |         |       |         | Lower Upper             |
| Blood            | 0.929                     | ± 0.047 | 0.071 | ± 0.01  | 0.053 | ± 0.004 | 0.048 0.058             |
| Heart            | 0.38                      | ± 0.051 | 0.185 | ± 0.041 | 0.197 | ± 0.017 |                         |
| Lung             | 0.858                     | ± 0.083 | 0.401 | ± 0.064 | 0.262 | ± 0.023 |                         |
| Muscle           | 0.288                     | ± 0.042 | 0.171 | ± 0.101 | 0.104 | ± 0.029 |                         |
| Bone             | 0.323                     | ± 0.022 | 0.14  | ± 0.027 | 0.148 | ± 0.038 |                         |
| Spleen           | 0.395                     | ± 0.031 | 0.13  | ± 0.025 | 0.132 | ± 0.025 |                         |
| Kidney           | 3.548                     | ± 0.402 | 1.384 | ± 0.327 | 0.382 | ± 0.031 | 0.333 0.430             |
| Liver            | 1.569                     | ± 0.236 | 1.431 | ± 0.54  | 0.426 | ± 0.033 | 0.386 0.467             |

**Table S3.** Mice biodistribution (%ID/g) of  $^{64}\text{Cu}$ -ECB-TE2A in selected organs at 30 min, 4 h and 24 h post injection.

| Tissue/<br>Organ | $^{64}\text{Cu}$ - ECB-TE2A |         |       |         |       |         |                         |
|------------------|-----------------------------|---------|-------|---------|-------|---------|-------------------------|
|                  | 30min                       |         | 4 h   |         | 24h   |         |                         |
|                  |                             |         |       |         |       |         | 95% confidence interval |
|                  |                             |         |       |         |       |         | Lower Upper             |
| Blood            | 1.277                       | ± 0.136 | 0.038 | ± 0.007 | 0.055 | ± 0.011 | 0.041 0.068             |
| Heart            | 0.460                       | ± 0.101 | 0.095 | ± 0.009 | 0.180 | ± 0.036 |                         |
| Lung             | 1.040                       | ± 0.164 | 0.237 | ± 0.033 | 0.230 | ± 0.033 |                         |
| Muscle           | 0.401                       | ± 0.003 | 0.077 | ± 0.024 | 0.145 | ± 0.02  |                         |
| Bone             | 0.45                        | ± 0.076 | 0.143 | ± 0.017 | 0.293 | ± 0.052 |                         |
| Spleen           | 0.482                       | ± 0.042 | 0.131 | ± 0.009 | 0.220 | ± 0.046 |                         |
| Kidney           | 4.984                       | ± 0.661 | 1.786 | ± 0.244 | 0.280 | ± 0.026 | 0.238 0.321             |
| Liver            | 1.300                       | ± 0.249 | 0.909 | ± 0.198 | 0.297 | ± 0.038 | 0.237 0.357             |

**References:**

- (1) Pandya, D. N.; Kim, J. Y.; Park, J. C.; Lee, H.; Phapale, P. B.; Kwak, W.; Choi, T. H.; Cheon, G. J.; Yoon, Y. R.; Yoo, J. Revival of TE2A; a better chelate for Cu(II) ions than TETA? *Chem Commun* **2010**, 46, 3517-3519.
- (2) Wong, E. H.; Weisman, G. R.; Hill, D. C.; Reed, D. P.; Rogers, M. E.; Condon, J. S.; Fagan, M. A.; Calabrese, J. C.; Lam, K.-C.; Guzei, I. A.; Rheingold, A. L. Synthesis and Characterization of Cross-Bridged Cyclams and Pendant-Armed Derivatives and Structural Studies of Their Copper(II) Complexes. *J. Am. Chem. Soc.* **2000**, 122, 10561-10572.
- (3) Pandya, D. N.; Dale, A. V.; Kim, J. Y.; Lee, H.; Ha, Y. S.; An, G. I.; Yoo, J. New macrobicyclic chelator for the development of ultrastable  $^{64}\text{Cu}$ -radiolabeled bioconjugate. *Bioconjugate Chem.* **2012**, 23, 330-335.
